# Supplementary figures and images for: Weight Bias Internalization and Eating Disorder Psychopathology in Treatment-Seeking Patients with Obesity
Source: MDPI journal article supplement (doi:10.3390/nu15132932), 2023-06-28

expectedInfluence

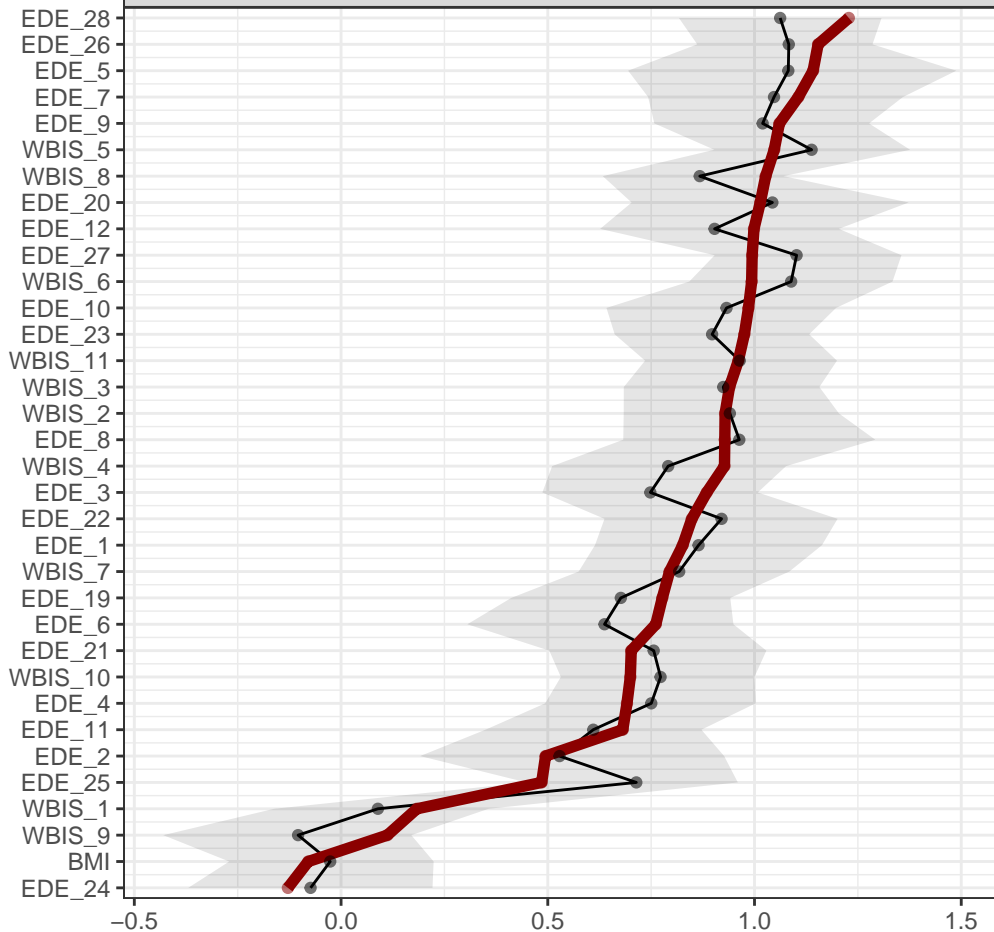

Supplement: s1 [file s1]
